# Supplementary material for: The type IV pilus chemoreceptor PilJ controls chemotaxis of one bacterial species towards another
Source: PLOS journal article supplement (doi:10.1371/journal.pbio.3002488), 2024-02-13
Supplement: S42 (10.1371/journal.pbio.3002488.s042) [file journal.pbio.3002488.s042]

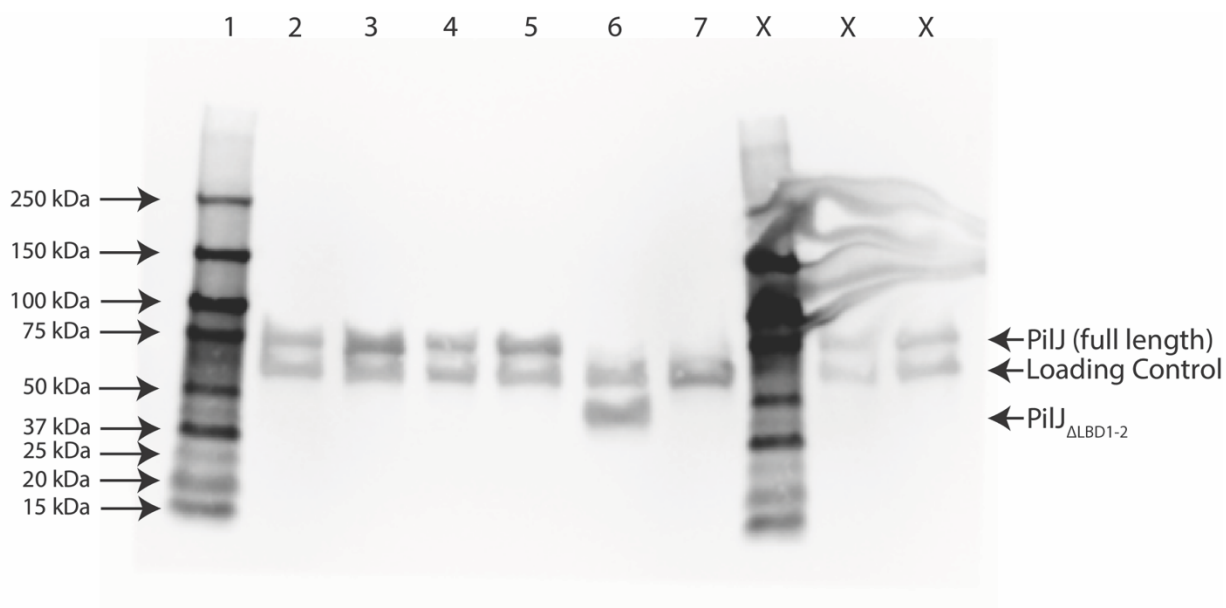

### Original blot image for S6 Fig.

Lanes 1-7 are shown in the final supplemental figure.

The final image was captured with an Azure Sapphire Imager.

Description of experimental sample in each lane:

Lane 1 = Molecular weight ladder. Molecular weights for each band are labeled to the left of the blot.

Lane 2 = Wildtype PilJ::6xHis protein from *P. aeruginosa* PA14 wildtype.

Lane 3 = Wildtype PilJ::6xHis protein from *P. aeruginosa* PA14  $\Delta$ *chpB*.

Lane 4 = Wildtype PilJ::6xHis protein from *P. aeruginosa* PA14  $\Delta$ *pilK*.

Lane 5 = PilJ<sub>Q412A, E413A</sub>::6xHis protein from *P. aeruginosa* PA14 *pilJ*<sub>Q412A, E413A</sub>.

Lane 6 = PilJ<sub>ΔLBD1-2</sub>::6xHis protein from *P. aeruginosa* PA14 *pilJ*<sub>ΔLBD1-2</sub>.

Lane 7 = Wildtype PilJ protein (untagged) from *P. aeruginosa* PA14 wildtype.

Lanes labeled with "X" were not included in the final figure.

The band for full length PilJ is around 75 kDa in lanes 2-5. The band for PilJ<sub>ΔLBD1-2</sub> is around 46 kDa in lane 6.

The band around 65 kDa in lanes 2-7 is the loading control.
